# Supplementary material
Source: publisher figshare collection journal article supplement (https://acs.figshare.com/ndownloader/files/4416376)
Supplement: Supplementary file 1 [file 4416376]

# Thermal stabilization of DMPC/DHPC bicelles by addition of cholesterol sulfate: SUPPLEMENT

Rebecca Shapiro,<sup>†</sup> Amanda Brindley,<sup>‡</sup> and Rachel W. Martin<sup>\*,‡,¶</sup>

*University of California, Irvine Departments of Physics, Chemistry, and Molecular Biology and  
Biochemistry*

E-mail: rwmartin@uci.edu

## Supporting Information

### Protocols

#### Bicelle Preparation

##### q=2.6

Powdered lipids were obtained from Avanti Polar Lipids and 50 mg DHPC was combined with 200 mg DMPC (q=2.6). Cholesterol or cholesterol sulfate was added to 13.4% with respect to moles DMPC. Lipids were diluted to 20% w/v lipids with 90% H<sub>2</sub>O and 10% D<sub>2</sub>O phosphate buffer (10 mM). The samples were pipetted into an NMR tube and heated to 37 °C until the viscosity visibly increased and were then cooled to 4 °C until there was a decrease in viscosity. The samples were then vortexed and cycled through the 37 °C, 4 °C three more times and allowed to hydrate until all components were soluble, which at 18 °C was 2 days for cholesterol and 4 days for cholesterol

---

\*To whom correspondence should be addressed

<sup>†</sup>University of California, Irvine Department of Physics

<sup>‡</sup>University of California, Irvine Department of Chemistry

<sup>¶</sup>University of California, Irvine Molecular Biology and Biochemistry

sulfate. The heating and cooling cycles were repeated before each set of experiments.

### **q=3.5**

Lipids dissolved in chloroform (20 mg/mL) were obtained from Avanti Polar Lipids. DHPC and DMPC were mixed in chloroform at a q=3.5 and 15% total lipids. The samples were dried for 4 hours under an N<sub>2</sub> stream in 25 mL Erlenmeyer flasks to allow the majority of chloroform to evaporate. The samples were lyophilized overnight. Cholesterol or cholesterol sulfate was added at 13.4% with respect to moles DMPC. The samples were resuspended in 10 mM phosphate buffer with 90% H<sub>2</sub>O and 10% D<sub>2</sub>O. The samples were pipetted into NMR tubes, cycled between 37 °C and 4 °C were hydrated until all components were soluble, which at 18 °C was 2 days for cholesterol and 4 days for cholesterol sulfate. The heating and cooling cycles were repeated before each set of experiments.

### **Protein Preparation**

The ubiquitin cDNA was obtained from Open Biosystems. A 6-histidine tag and a TEV protease site was added by PCR using primers synthesized by Sigma-Genosys. The constructed gene was sub-cloned into a pET-28a vector and expressed in Rosetta *E. coli*. The cell free extract was purified using Ni-affinity FPLC. The ubiquitin was desalted into 10 mM phosphate buffer using a desalting column and lyophilized. Ubiquitin was added to the bicelle mixture to give an approximate concentration of 0.3 mM protein. The constructed gene was sub-cloned into a pET-28a vector and expressed in Rosetta *E. coli* using <sup>15</sup>N labeled minimal media.

### **Bicelles with Ubiquitin**

Bicelles were prepared as described with a q=3.5 and 13.6% w/v lipids with 13.4% cholesterol or cholesterol sulfate. They were hydrated at 18 °C in 0.4 mL D<sub>2</sub>O with 150 mM NaCl, 25 mM phosphate buffer pH 6.8 for two days. The protein (100 μL) was added to a total concentration of 0.3 mM. The sample was hydrated at 4 °C until all components were soluble, which was an additional two days for cholesterol and and additional 4 days for cholesterol sulfate.

## Additional NMR Data

| <b>Temperature Dependence of Measured <math>^2\text{H}</math> Quadrupolar Splitting (Hz) in <math>q=2.6</math>, 20% w/v DMPC/DHPC Bicelles Doped as Listed</b> |                     |                    |                            |
|----------------------------------------------------------------------------------------------------------------------------------------------------------------|---------------------|--------------------|----------------------------|
| <b>Temperature</b>                                                                                                                                             | <b>No Additives</b> | <b>Cholesterol</b> | <b>Cholesterol Sulfate</b> |
| 21.7 °C                                                                                                                                                        | 0.00                | 0.00               | 0.00                       |
| 25 °C                                                                                                                                                          | 0.00                | 0.92               | 13.48                      |
| 30 °C                                                                                                                                                          | 5.07                | 2.17               | 20.79                      |
| 35 °C                                                                                                                                                          | 27.54               | 34.22              | 40.02                      |
| 37 °C                                                                                                                                                          | *,*                 | 31.16              | 39.51                      |
| 40 °C                                                                                                                                                          | 34.51               | *,*                | *,*                        |
| 45 °C                                                                                                                                                          | 0.00                | 38.82              | 45.78                      |
| 50 °C                                                                                                                                                          | 0.00                | 0.00               | 64.47                      |
| 55 °C                                                                                                                                                          | 0.00                | 0.00               | 0.00                       |
| *,* = not measured                                                                                                                                             |                     |                    |                            |

| <b>Temperature Dependence of Measured <math>^2\text{H}</math> Quadrupolar Splitting (Hz) in <math>q=3.5</math>, 25% w/v DMPC/DHPC/CS</b> |      |
|------------------------------------------------------------------------------------------------------------------------------------------|------|
| 25 °C                                                                                                                                    | 9.9  |
| 30 °C                                                                                                                                    | 6.2  |
| 35 °C                                                                                                                                    | 28.9 |
| 40 °C                                                                                                                                    | 30.0 |
| 45 °C                                                                                                                                    | 33.8 |
| 50 °C                                                                                                                                    | 37.5 |
| 55 °C                                                                                                                                    | 49.8 |

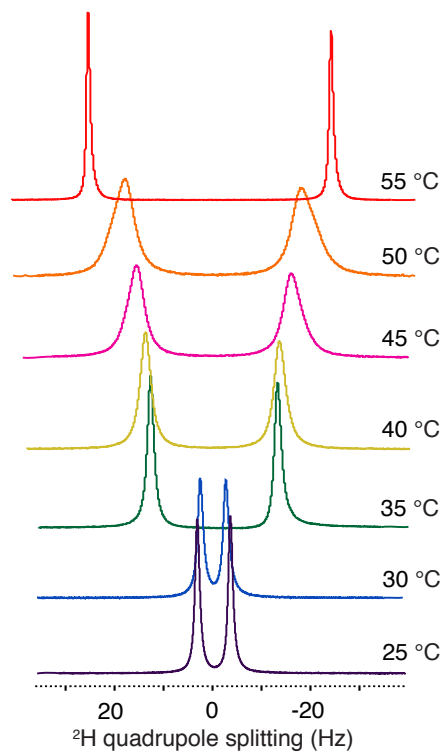

Figure 1: Deuterium quadrupole splitting in 10% D<sub>2</sub>O/90% H<sub>2</sub>O of  $q = 3.5$  DMPC/DHPC bicelles of total lipid content 25% w/v doped with cholesterol sulfate (CS) to 13.4% of the lipid content. Measurements were made at temperatures of 25 °C to 55 °C in a 400 MHz Bruker DRX instrument. As with the  $q=2.6$  bicelles described by Figure 1 of the paper, CS-doping increases the temperature range of stable alignment. The deviation from the trend at 30 °C is reproducible, possibly suggesting a phase transition from one aligned phase to another.

## <sup>15</sup>N HSQC RDC Measurements

| Measured Splittings (Hz) and RDCs for Given Ubiquitin Sample Type |                      |                        |                       |                        |
|-------------------------------------------------------------------|----------------------|------------------------|-----------------------|------------------------|
| Residue <sup>†</sup>                                              | Isotropic J-coupling | CS-Doped Bicelles 32°C | Undoped Bicelles 32°C | CS-Doped Bicelles 25°C |
| Gln 62-SC                                                         | 180.0                | 169.0                  | 177.0                 | 168.0                  |
| RDCs:                                                             |                      | -11.0                  | -3.0                  | -12.0                  |
| Gly 75                                                            | 95.0                 | 82.0                   | 92.0                  | 80.0                   |
| RDCs:                                                             |                      | -13.0                  | -3.0                  | -15.0                  |
| Gly 76                                                            | 93.0                 | 96.0                   | 90.0                  | 96.0                   |
| RDCs:                                                             |                      | 3.0                    | -3.0                  | 3.0                    |
| Ser 20                                                            | 93.0                 | 94.0                   | 87.0                  | 98.0                   |
| RDCs:                                                             |                      | 1.0                    | -6.0                  | 5.0                    |
| Lys 33                                                            | 93.0                 | 109.0                  | 91.0                  | 110.0                  |
| RDCs:                                                             |                      | 16.0                   | -2.0                  | 17.0                   |
| Asp 39                                                            | 93.0                 | 79.0                   | 91.0                  | 80.0                   |
| RDCs:                                                             |                      | -14.0                  | -2.0                  | -13.0                  |
| Gln 31-SC                                                         | 180.0                | 197.0                  | 186.0                 | 195.0                  |
| RDCs:                                                             |                      | 17.0                   | 6.0                   | 15.0                   |
| Asn 60-SC                                                         | 178.0                | 193.0                  | 181.0                 | 192.0                  |
| RDCs:                                                             |                      | 15.0                   | 3.0                   | 14.0                   |
| Ser 65                                                            | 94.0                 | 124.0                  | 93.0                  | 123.0                  |
| RDCs:                                                             |                      | 30.0                   | -1.0                  | 29.0                   |
| Gly 47                                                            | 115.0                | 92.0                   | 88.0                  | 114.0                  |
| RDCs:                                                             |                      | -23.0                  | -27.0                 | -1.0                   |
| Asn 25                                                            | 93.0                 | 84.0                   | 88.0                  | 83.0                   |
| RDCs:                                                             |                      | -9.0                   | -5.0                  | -10.0                  |
| Asn 25-SC                                                         | 173.0                | 181.0                  | 176.0                 | 178.0                  |
| RDCs:                                                             |                      | 8.0                    | 3.0                   | 5.0                    |
| Gln 2-SC                                                          | 176.0                | 192.0                  | 180.0                 | 190.0                  |
| RDCs:                                                             |                      | 16.0                   | 4.0                   | 14.0                   |

Figure 2: Summary of RDCs for select ubiquitin residues. Doublets were taken from the IP spectra of <sup>15</sup>N-HSQC-IPAP data taken on an 800 MHz Varian Inova instrument. Parameters used in data acquisition: recycle delay=1.4 s, B<sub>1</sub> field strength=38.5 kHz, decoupling power=1.4 kHz, <sup>1</sup>H spectral width=10 kHz, <sup>15</sup>N spectral width=3.4 kHz, number of scans=64, acquisition length in <sup>1</sup>H dimension=1500, acquisition length in <sup>15</sup>N dimension=128. All couplings are from backbone <sup>1</sup>H-<sup>15</sup>N pairs except for those listed as "SC," which are from side chains. <sup>†</sup> SC peaks originate from the NH<sub>2</sub> group of the side chain of the residue listed. Because this experiment gives 1:0:1 triplets for NH<sub>2</sub> spin systems, the splittings shown for these residues are 2J for the isotropic J-coupling values and 2(J+D) for the aligned values, which have additional residual dipolar coupling.
